# Supplementary material
Source: PubMed Central journal article supplement (PMC7504962)
Supplement: IAI.00133-20-s0001.pdf [file IAI.00133-20-s0001.pdf]

1  
2  
3  
4  
5  
6  
7  
8  
9  
10  
11  
12

**SUPPLEMENTAL INFORMATION**

A role of epithelial cells and virulence factors in biofilm formation by  
*Streptococcus pyogenes in vitro*

By: Feiruz Alamiri, Yashuan Chao, Maria Baumgarten,  
Kristian Riesbeck and Anders P. Hakansson

## 13 SUPPLEMENTARY FIGURES

14

## A) BIOMASS

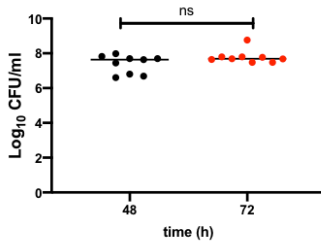

## B) GENTAMICIN KILLING

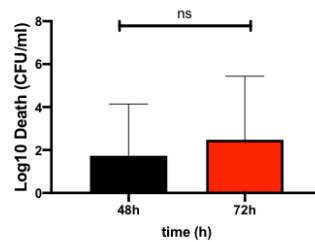

## C) BIOFILM STRUCTURE

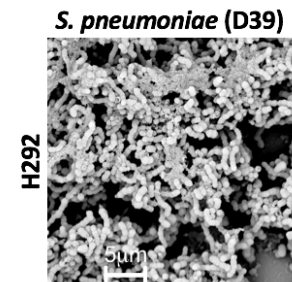

15

16

17 **Figure S1. Biofilm growth, antibiotic resistance, and structure of *Streptococcus***  
 18 ***pneumoniae* on pre-fixed epithelial cells.** (A and B). Biofilms developed over 48 (black color)  
 19 and 72 h (red color) at 34°C in CDM were assessed for biomass and gentamicin killing. (A)  
 20 Biomass formation on pre-fixed epithelial H292 cells for *Streptococcus pneumoniae* (Spn-D39)  
 21 was evaluated by assessing the Log<sub>10</sub> colony forming units [CFU] per ml. The results represent  
 22 data from 3 separate experiments of 3 individual biofilms each (n = 9) and data was compared  
 23 using the Mann-Whitney U test. (B) Gentamicin sensitivity in Spn-D39 biofilms was  
 24 determined by calculating the Log<sub>10</sub> death in CFU/ml (i.e., the total biomass CFU/ml – biofilm  
 25 biomass CFU/ml after treatment with 500 μg/ml gentamicin for 3 h). The results represent the  
 26 mean data from three separate experiments of three individual biofilms each (± SD; n = 3), and  
 27 data was compared using Student's t-test. For all statistical analyses: ns, non-significant  
 28 difference. (C) The structure of Spn-D39 biofilms formed on pre-fixed epithelial cells for 72 h  
 29 was visualized using SEM (scale bar = 5 μm).

30

**A) BIOMASS**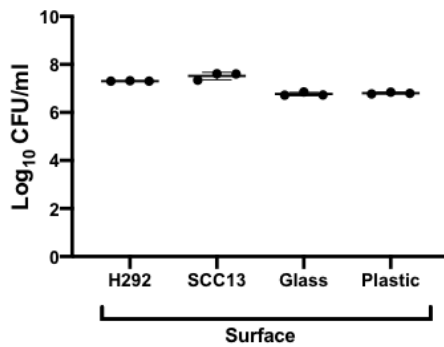**B) GENTAMICIN KILLING**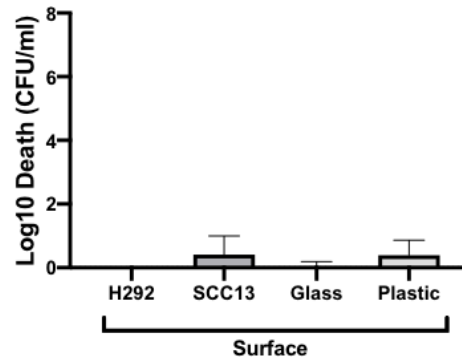

31

32 **Figure S2. Biofilm growth and antibiotic resistance of GAS-771 formed on biological vs**

33 **abiotic surfaces.** Biofilms developed over 72 h at 34°C on biological (pre-fixed respiratory

34 H292 cells or SCC13 keratinocytes) or abiotic (Glass or Plastic) surfaces were assessed for

35 biomass and gentamicin sensitivity. (A) Biomass formation of biofilms formed on biological

36 (pre-fixed H292 cells or SCC13 keratinocytes) or abiotic (Glass or Plastic) surfaces for the

37 GAS-771 strain was evaluated by measuring the Log<sub>10</sub> colony forming units [CFU] per ml. The

38 results represent data from one experiment with 3 individual biofilms (± SD; n = 3). (B)

39 Determination of gentamicin killing in GAS-771 biofilms was performed by calculating the

40 Log<sub>10</sub> death in CFU/ml (i.e., the total biomass CFU/ml – biofilm biomass CFU/ml after

41 treatment with 500 µg/ml gentamicin for 3 h). The results represent the mean data from one

42 experiment of three individual biofilms (± SD; n = 3). Student's t-test was used for comparison

43 of biomass (A) or gentamicin killing (B) between groups of data points.

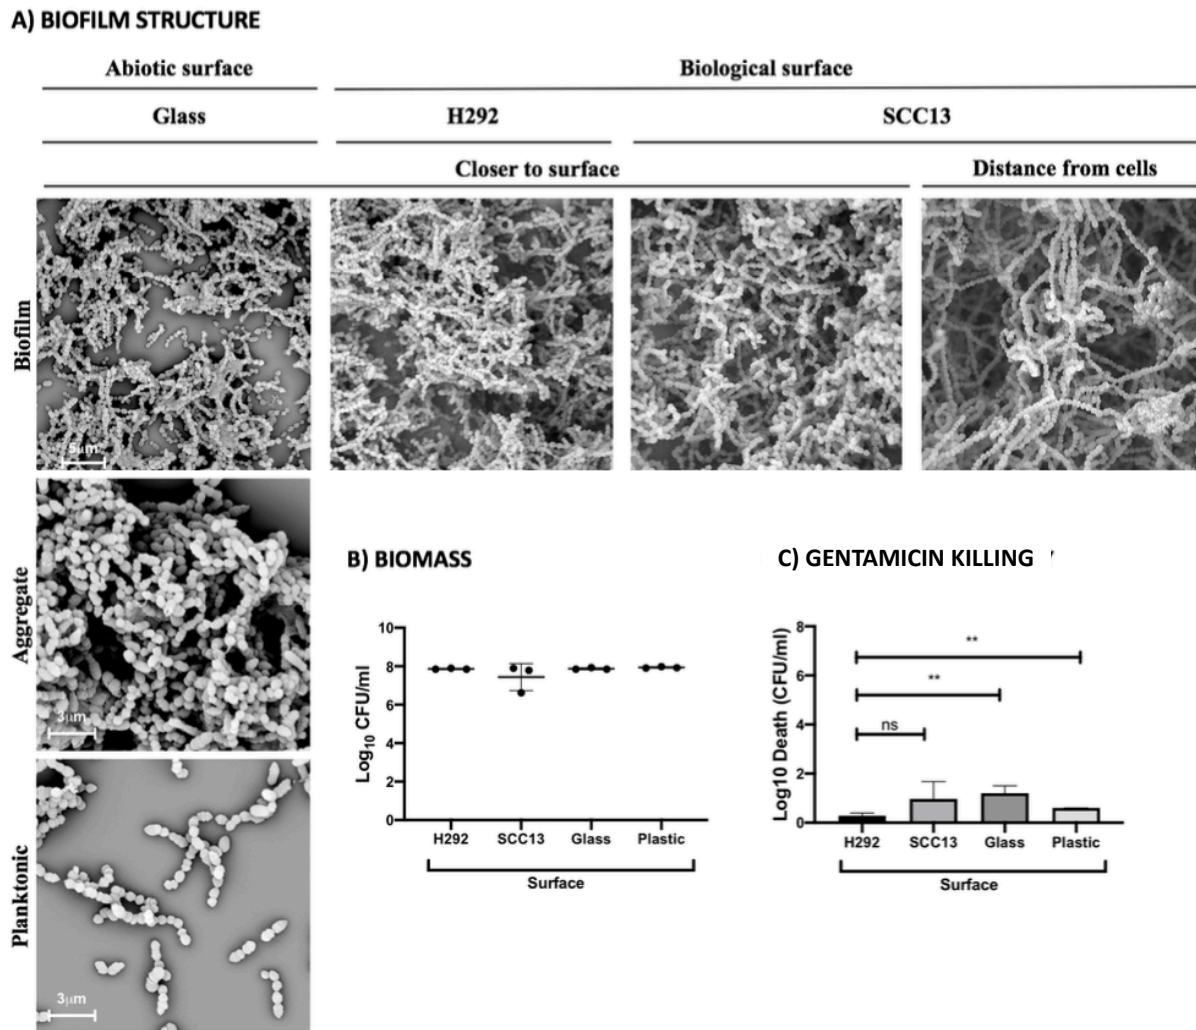

44

45

46 **Figure S3. Stages of M5 bacterial growth, antibiotic resistance and structure on abiotic or**  
 47 **biological surfaces.** (A) M5 (Manfredo) bacteria were used to form biofilms in CDM over 72h  
 48 at 34 °C on glass or pre-fixed epithelial cells (respiratory H292 cells or SCC13 keratinocytes).  
 49 Additionally, M5 bacteria were grown planktonically in CDM at 34 °C until reaching the  
 50 exponential phase and were then seeded onto glass to observe the level of bacterial aggregation.  
 51 Samples were visualized using SEM for biofilms (scale bar = 5 µm) or for planktonic and  
 52 aggregated bacteria (scale bar = 3 µm). Although a low level of aggregation occurred in  
 53 planktonic cultures, visualization of both aggregate and free chains are presented. (B and C).  
 54 Biofilms formed over 72 h at 34°C on biological (pre-fixed respiratory H292 cells or SCC13  
 55 keratinocytes) or abiotic (Glass or Plastic) surfaces were assessed for biomass and gentamicin  
 56 killing. (B) Biomass was evaluated by measuring the Log<sub>10</sub> colony forming units [CFU] per ml.  
 57 The results represent data from one experiment with three individual biofilms each (± SD; n =  
 58 3). (C) Determination of gentamicin killing was performed by calculating the Log<sub>10</sub> death in

59 CFU/ml (i.e., the total biomass CFU/ml – biofilm biomass CFU/ml after treatment with 500  
60  $\mu\text{g/ml}$  gentamicin for 3 h). The results represent the mean data from one experiment of three  
61 individual biofilms each ( $\pm$  SD;  $n = 3$ ). Student's t-test was used for comparison of biomass (B)  
62 or gentamicin sensitivity (C) between groups of data points. \*\*,  $P < 0.01$  and ns, non-significant  
63 difference.

64

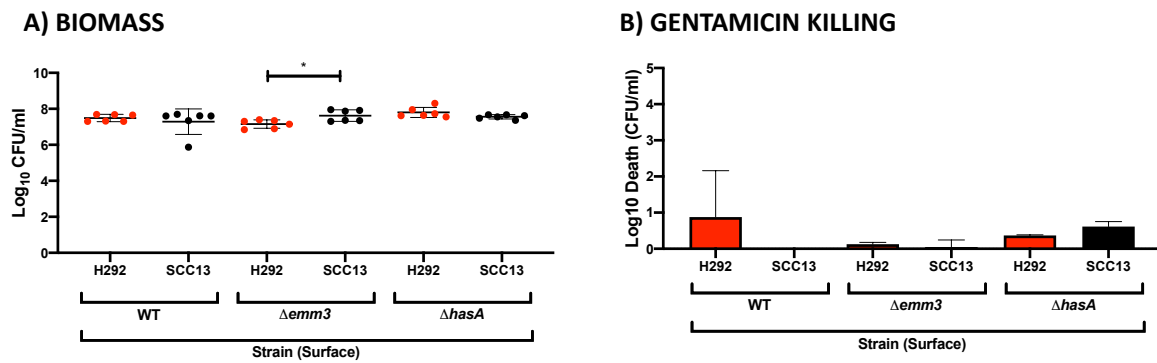

65

66

67 **Figure S4. Biofilm growth and antibiotic resistance in the presence or absence of M3**  
 68 **protein or capsule.** Biofilms developed over 72 h at 34°C on biological (pre-fixed respiratory  
 69 H292 cells or SCC13 keratinocytes) were assessed for biomass and gentamicin killing. (A)  
 70 Biomass formation of biofilms formed on biological (pre-fixed H292 cells or SCC13  
 71 keratinocytes) surfaces for the WT (GAS-771) strain and its isogenic mutants lacking M3  
 72 protein ( $\Delta emm3$ ) or capsule ( $\Delta hasA$ ) was evaluated by measuring the Log<sub>10</sub> colony forming  
 73 units [CFU] per ml. The results represent data from two experiments with 3 individual biofilms  
 74 each ( $\pm$  SD; n = 6). (B) Determination of gentamicin sensitivity in WT,  $\Delta emm3$  and  $\Delta hasA$   
 75 biofilms was performed by calculating the Log<sub>10</sub> death in CFU/ml (i.e., the total biomass  
 76 CFU/ml – biofilm biomass CFU/ml after treatment with 500  $\mu$ g/ml gentamicin for 3 h). The  
 77 results represent the mean data from two experiments of six individual biofilms ( $\pm$  SD; n = 3).  
 78 Mann-Whitney U test was used for comparison of biomass (A) or gentamicin killing (B)  
 79 between groups of data points.

80

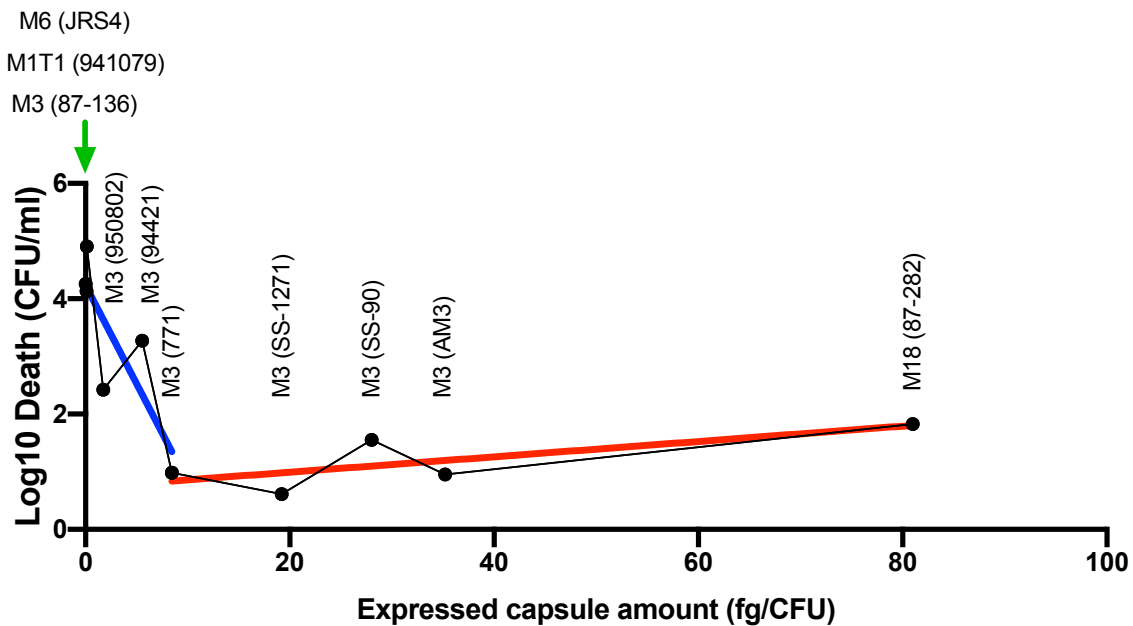

81

82 **Figure S5. High capsule expression correlates with the ability of GAS to form functional**  
 83 **biofilms.** The gentamicin sensitivity (in log<sub>10</sub> death after gentamicin treatment) of biofilms of  
 84 the GAS M1T1 (941079), M6 (JRS4), M3 (GAS-771, 87136, 950802, 94421, SS-1271, SS-90  
 85 or AM3), or M18 (87-282) strains after 72h at 34°C on pre-fixed H292 cells was plotted against  
 86 the level of capsule expressed by each strain when grown in media (in fg/CFU). The blue line  
 87 represents the linear correlation of gentamicin killing and capsule production for strains  
 88 expressing <8 fg/CFU of hyaluronic acid capsule ( $P < 0.05$  by simple linear regression  
 89 analysis), while the red line represents the lack of a significant correlation ( $P > 0.05$  by simple  
 90 linear regression analysis) for strains expressing >8 fg/CFU of hyaluronic acid. The green arrow  
 91 indicates the plotted values on the y-axis corresponding to the strains M6 (JRS4), M1T1  
 92 (941079), and M3 (87-136) that all expressed very low capsule levels.

93

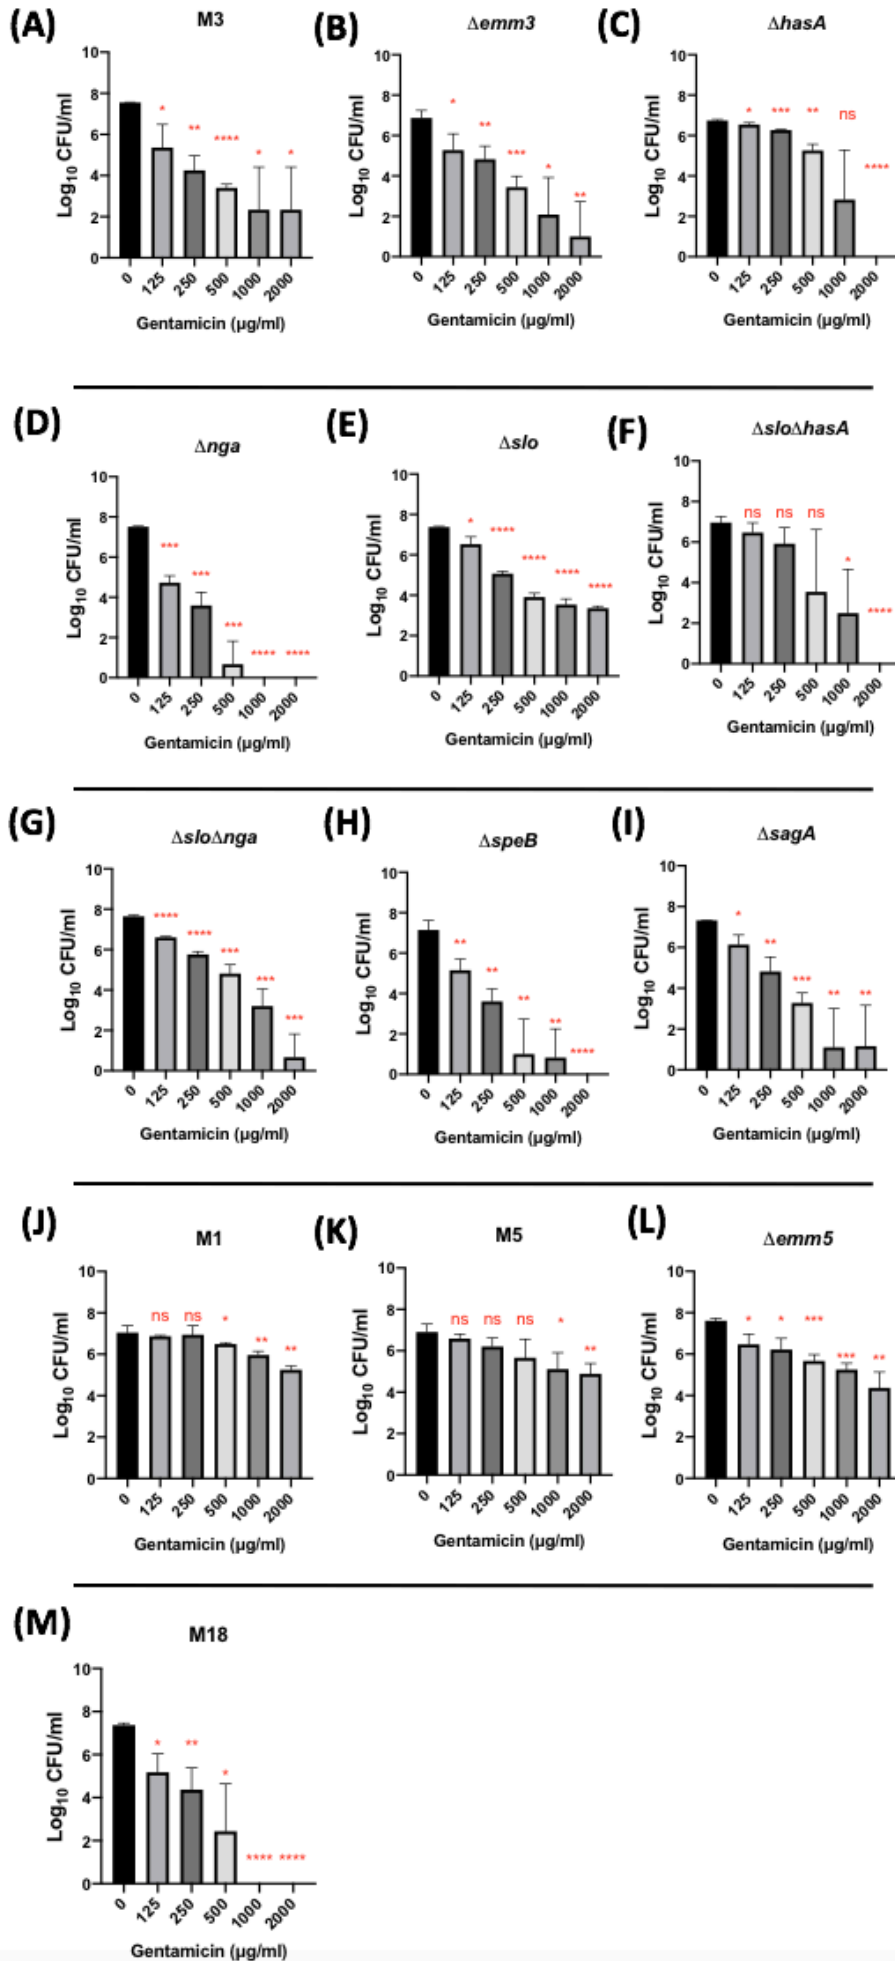



95 **Figure S6. Gentamicin sensitivity of planktonic GAS grown in broth.** Planktonic GAS  
96 bacteria grown in CDM were assessed for gentamicin sensitivity by determining the Log<sub>10</sub>  
97 colony forming units [CFU] per ml after exposure to indicated gentamicin concentrations (in  
98 µg/ml) for 3 h at 34 °C. Each assay was performed three times (n=3). Differences in gentamicin  
99 induced killing compared to the non-treated control were analyzed using the Student's t-test.  
100 Statistical significance is displayed as follows: \*,  $P < 0.05$ , \*\*,  $P < 0.01$ , \*\*\*,  $P < 0.001$  and  
101 ns, non-significant difference.
